# Supplementary material for: New Quaternary Ammonium Derivatives Based on Citrus Pectin
Source: MDPI journal article supplement (doi:10.3390/polym15234492), 2023-11-22
Supplement: s1 [file s1]

## Supplementary Material

### **New quaternary ammonium derivatives based on citrus pectin**

Magdalena-Cristina Stanciu<sup>1,\*</sup>, Marieta Nichifor<sup>1</sup>, Gabriela-Liliana Ailiesei<sup>1</sup>, Irina Popescu<sup>1</sup>, Gabriela-Elena Hitruc<sup>1</sup>, Luminita Ghimici<sup>1</sup>, Cristina G. Tuchilus<sup>2</sup>

<sup>1</sup>“Petru Poni” Institute of Macromolecular Chemistry, 41A, Gr. Ghica-Voda Alley, Iasi, 700487, Romania;  
cstanciu@icmpp.ro (M.-C.S.); nichifor@icmpp.ro (M.N.); gdarvaru@icmpp.ro (G.-L.A.); ipopescu@icmpp.ro (I.P.); gabihit@icmpp.ro (G.-E.H.); lghimici@icmpp.ro (L.G.)

<sup>2</sup>“Grigore T. Popa” University of Medicine and Pharmacy, Faculty of Medicine, 16, University Street, Iasi, 700115 Romania; ctuchilus@yahoo.com (C.G.T.)

\* Correspondence: cstanciu@icmpp.ro

**Table S1.**  $^1\text{H}$  and  $^{13}\text{C}$ NMR chemical shift values for **PC** and **PC-QEt38**

| Type of atom                          | Polymer code | Type of atom                     | Polymer code |
|---------------------------------------|--------------|----------------------------------|--------------|
|                                       | PC           |                                  | PC-QEt38     |
| <b>H-1</b> (COOH+COOCH <sub>3</sub> ) | 5.08         | <b>H-1</b>                       | 5.06         |
| <b>H-2</b> (COOH)                     | 3.65         | <b>H-2</b>                       | 3.76         |
| <b>H-2</b> (COOCH <sub>3</sub> )      | 3.71         | <b>H-3</b>                       | 4.00         |
| <b>H-3</b> (COOH)                     | 4.17         | <b>H-4</b>                       | 4.46         |
| <b>H-3</b> (COOCH <sub>3</sub> )      | 4.00         | <b>H-5</b>                       | 5.06         |
| <b>H-4</b> (COOH+COOCH <sub>3</sub> ) | 4.45         | <b>H-6</b>                       | -            |
| <b>H-5</b> (COOH)                     | 4.64         | <b>H-7</b>                       | 3.75-4.03    |
| <b>H-5</b> (COOCH <sub>3</sub> )      | 4.96         | <b>H-8</b>                       | 4.46         |
| <b>H-6</b>                            | -            | <b>H-9</b>                       | 3.34-3.58    |
| <b>-OCH<sub>3</sub></b>               | 3.80         | <b>H-10</b>                      | 3.12-3.19    |
|                                       |              | <b>H-11</b>                      | 3.34-3.58    |
|                                       |              | <b>H-12</b>                      | 1.35-1.39    |
|                                       |              | <b>-OCH<sub>3</sub></b>          | 3.76         |
| <b>C-1</b>                            | 103.21       | <b>C-1</b>                       | 102.58       |
| <b>C-2</b>                            | 70.75        | <b>C-2</b>                       | 70.96        |
| <b>C-3</b>                            | 70.75        | <b>C-3</b>                       | 70.73        |
| <b>C-4</b>                            | 81.33        | <b>C-4</b>                       | 81.05        |
| <b>C-5</b>                            | 73.56        | <b>C-5</b>                       | 73.17        |
| <b>C-6</b> (COOH)                     | 176.90       | <b>C-6</b> (COOH)                | 175.48       |
| <b>C-6</b> (COOCH <sub>3</sub> )      | 173.65       | <b>C-6</b> (COOCH <sub>3</sub> ) | 168.97       |
| <b>-OCH<sub>3</sub></b>               | 55.70        | <b>C-7</b>                       | 72.82        |
|                                       |              | <b>C-8</b>                       | 64.22        |
|                                       |              | <b>C-9</b>                       | 67.78        |
|                                       |              | <b>C-10</b>                      | 54.10        |
|                                       |              | <b>C-11</b>                      | 64.82        |
|                                       |              | <b>C-12</b>                      | 10.37        |
|                                       |              | <b>-OCH<sub>3</sub></b>          | 53.36        |

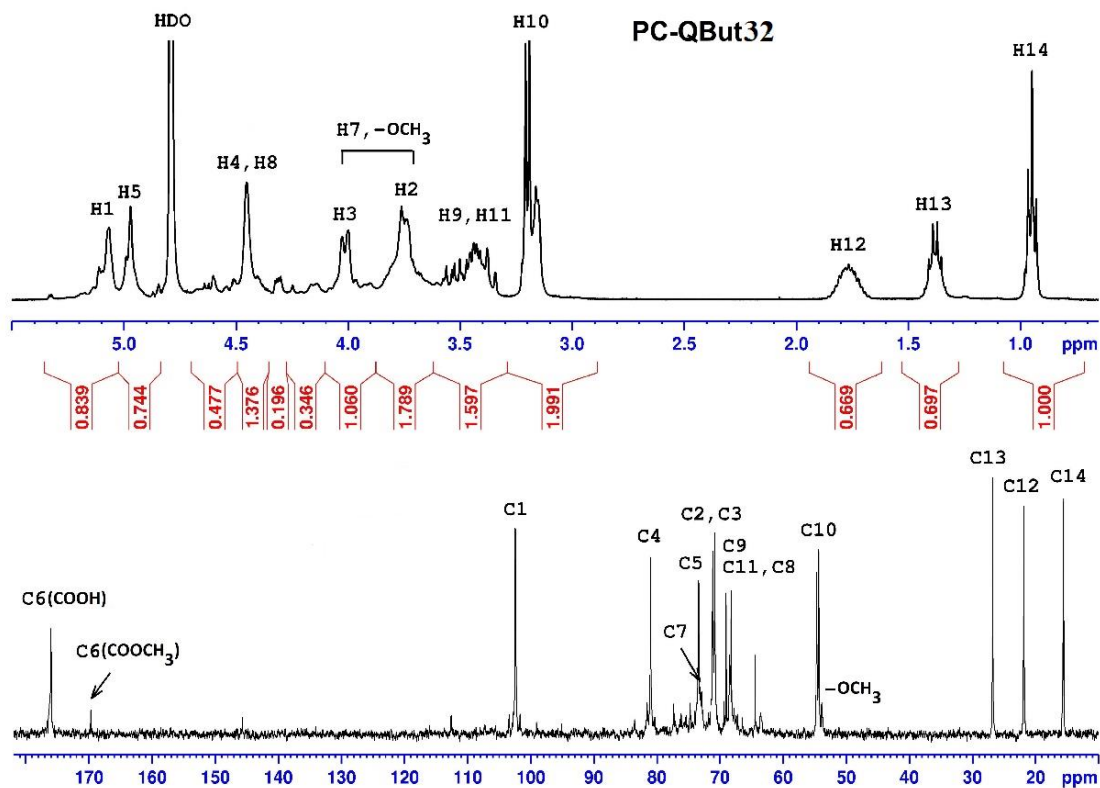

**Figure S1.**  $^1\text{H}$  (up) and  $^{13}\text{C}$  (down) NMR spectra of PC-QBut32 in  $\text{D}_2\text{O}$ , with signals assignment.

**Table S2.**  $^1\text{H}$  and  $^{13}\text{C}$  NMR chemical shift values for PC-QBut32

| Polymer code | Chemical shift values, $\delta$ (ppm) |                |                          |                |
|--------------|---------------------------------------|----------------|--------------------------|----------------|
|              | $^1\text{H}$ NMR                      |                | $^{13}\text{C}$ NMR      |                |
|              | Hydrogen atom                         | $\delta$ (ppm) | Carbon atom              | $\delta$ (ppm) |
| PC-QBut32    | H-1                                   | 5.06           | C-1                      | 102.46         |
|              | H-2                                   | 3.73           | C-2                      | 71.15          |
|              | H-3                                   | 3.99           | C-3                      | 70.84          |
|              | H-4                                   | 4.45           | C-4                      | 81.02          |
|              | H-5                                   | 4.97           | C-5                      | 73.40          |
|              | H-6                                   | -              | C-6(COOH)                | 176.02         |
|              | H-7                                   | 3.73-4.02      | C-6(COOCH <sub>3</sub> ) | 169.72         |
|              | H-8                                   | 4.40           | C-7                      | 72.86          |
|              | H-9                                   | 3.34-3.57      | C-8                      | 68.25          |
|              | H-10                                  | 3.15-3.20      | C-9                      | 69.03          |
|              | H-11                                  | 3.34-3.57      | C-10                     | 54.35          |
|              | H-12                                  | 1.76           | C-11                     | 68.48          |
|              | H-13                                  | 1.35-1.40      | C-12                     | 21.83          |
|              | H-14                                  | 0.92-0.96      | C-13                     | 26.79          |
|              | -OCH <sub>3</sub>                     | 3.76           | C-14                     | 15.59          |
|              |                                       |                | -OCH <sub>3</sub>        | 53.92          |

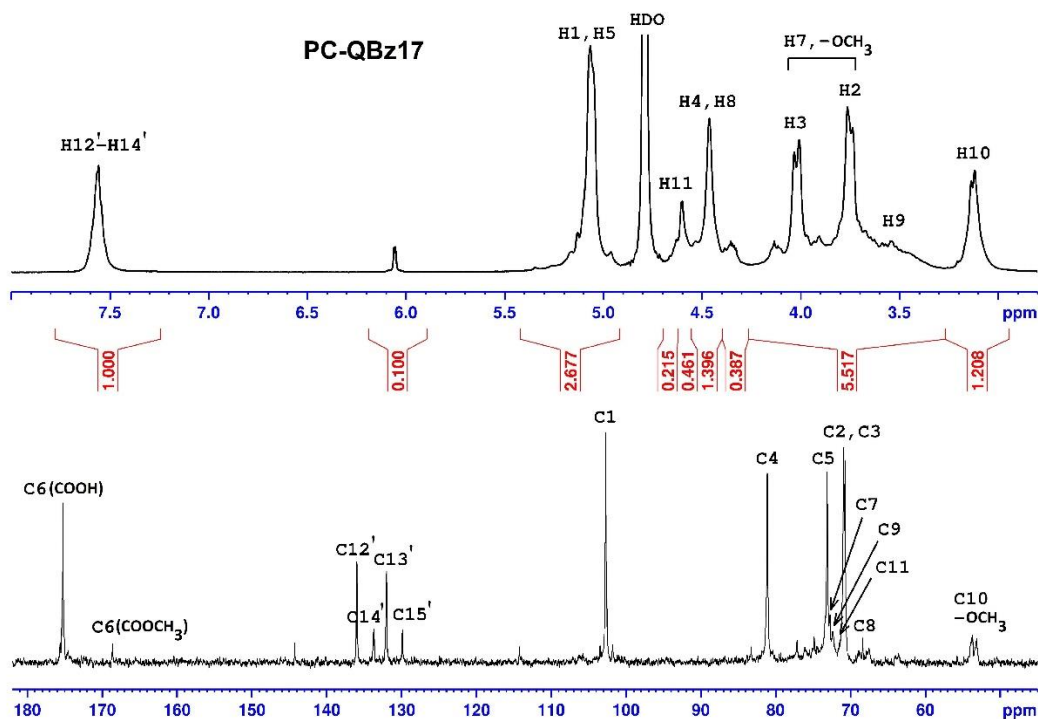

**Figure S2.** <sup>1</sup>H (up) and <sup>13</sup>C (down) NMR spectra of PC-QBz17 in D<sub>2</sub>O, with signals assignment.

**Table S3.** <sup>1</sup>H and <sup>13</sup>C NMR chemical shift values for PC-QBz17

| Polymer code | Chemical shift values, $\delta$ (ppm) |                |                          |                |
|--------------|---------------------------------------|----------------|--------------------------|----------------|
|              | <sup>1</sup> H NMR                    |                | <sup>13</sup> C NMR      |                |
|              | Hydrogen atom                         | $\delta$ (ppm) | Carbon atom              | $\delta$ (ppm) |
| PC-QBz17     | H-1                                   | 5.06           | C-1                      | 102.71         |
|              | H-2                                   | 3.73           | C-2                      | 70.91          |
|              | H-3                                   | 4.00           | C-3                      | 70.73          |
|              | H-4                                   | 4.46           | C-4                      | 81.12          |
|              | H-5                                   | 5.06           | C-5                      | 73.11          |
|              | H-6                                   | -              | C-6(COOH)                | 175.24         |
|              | H-7                                   | 3.73-4.03      | C-6(COOCH <sub>3</sub> ) | 168.62         |
|              | H-8                                   | 4.53           | C-7                      | 72.75          |
|              | H-9                                   | 3.54           | C-8                      | 68.35          |
|              | H-10                                  | 3.11-3.13      | C-9                      | 72.40          |
|              | H-11                                  | 4.60           | C-10                     | 53.71          |
|              | H-12'                                 | 7.56           | C-11                     | 71.49          |
|              | H-13'                                 | 7.56           | C-12'                    | 135.96         |
|              | H-14'                                 | 7.56           | C-13'                    | 131.99         |
|              | -OCH <sub>3</sub>                     | 3.76           | C-14'                    | 133.67         |
|              |                                       |                | C-15'                    | 129.89         |
|              |                                       |                | -OCH <sub>3</sub>        | 53.12          |

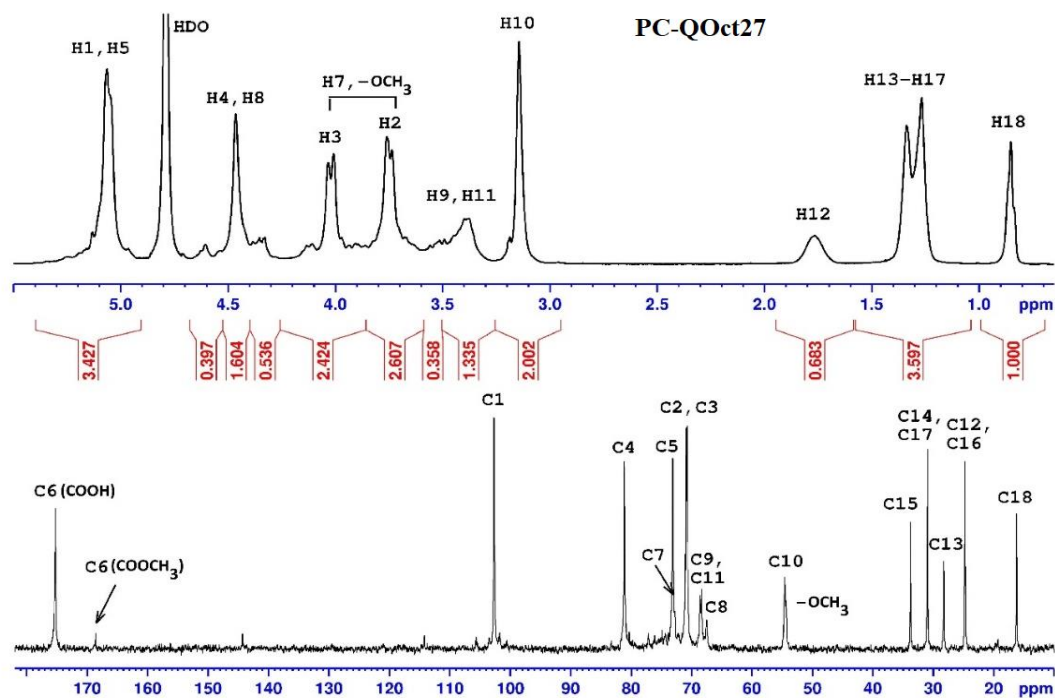

**Figure S3.**  $^1\text{H}$  (up) and  $^{13}\text{C}$  (down) NMR spectra of PC-QOct27 in  $\text{D}_2\text{O}$ , with signals assignment.

**Table S4.**  $^1\text{H}$  and  $^{13}\text{C}$  NMR chemical shift values for PC-QOct27

| Polymer code | Chemical shift values, $\delta$ (ppm) |                |                          |                |
|--------------|---------------------------------------|----------------|--------------------------|----------------|
|              | $^1\text{H}$ NMR                      |                | $^{13}\text{C}$ NMR      |                |
|              | Hydrogen atom                         | $\delta$ (ppm) | Carbon atom              | $\delta$ (ppm) |
| PC-QOct26    | H-1                                   | 5.06           | C-1                      | 102.68         |
|              | H-2                                   | 3.73           | C-2                      | 70.90          |
|              | H-3                                   | 4.00           | C-3                      | 70.72          |
|              | H-4                                   | 4.46           | C-4                      | 81.11          |
|              | H-5                                   | 5.06           | C-5                      | 73.11          |
|              | H-6                                   | -              | C-6(COOH)                | 175.25         |
|              | H-7                                   | 3.75-4.03      | C-6(COOCH <sub>3</sub> ) | 168.62         |
|              | H-8                                   | 4.46           | C-7                      | 72.74          |
|              | H-9                                   | 3.37-3.56      | C-8                      | 67.48          |
|              | H-10                                  | 3.14-3.18      | C-9                      | 68.61          |
|              | H-11                                  | 3.37-3.56      | C-10                     | 54.59          |
|              | H-12                                  | 1.76           | C-11                     | 68.35          |
|              | H-13 – H-17                           | 1.26-1.33      | C-12                     | 24.77          |
|              | H-18                                  | 0.85           | C-13                     | 28.23          |
|              | -OCH <sub>3</sub>                     | 3.76           | C-14                     | 30.92          |
|              |                                       |                | C-15                     | 33.75          |
|              |                                       |                | C-16                     | 24.77          |
|              |                                       |                | C-17                     | 30.92          |
|              |                                       |                | C-18                     | 16.19          |
|              |                                       |                | -OCH <sub>3</sub>        | 54.33          |

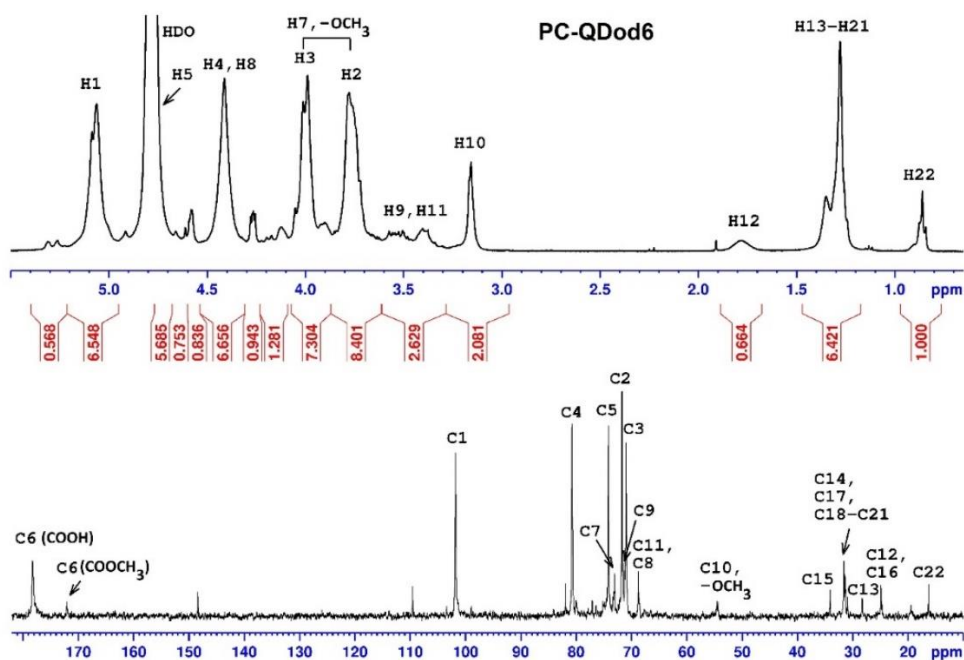

**Figure S4.**  $^1\text{H}$  (up) and  $^{13}\text{C}$  (down) NMR spectra of PC-QDod6 in  $\text{D}_2\text{O}$ , with signals assignment.

**Table S5.**  $^1\text{H}$  and  $^{13}\text{C}$  NMR chemical shift values for PC-QDod6

| Polymer code | Chemical shift values, $\delta$ (ppm) |                |                           |                |
|--------------|---------------------------------------|----------------|---------------------------|----------------|
|              | $^1\text{H}$ NMR                      |                | $^{13}\text{C}$ NMR       |                |
|              | Hydrogen atom                         | $\delta$ (ppm) | Carbon atom               | $\delta$ (ppm) |
| PC-QDod6     | H-1                                   | 5.06           | C-1                       | 101.83         |
|              | H-2                                   | 3.76           | C-2                       | 71.71          |
|              | H-3                                   | 3.98           | C-3                       | 70.99          |
|              | H-4                                   | 4.41           | C-4                       | 80.76          |
|              | H-5                                   | 4.76           | C-5                       | 74.17          |
|              | H-6                                   | -              | C-6(COOH)                 | 178.27         |
|              | H-7                                   | 3.76-4.01      | C-6(COOCH <sub>3</sub> )  | 172.03         |
|              | H-8                                   | 4.41           | C-7                       | 73.06          |
|              | H-9                                   | 3.37-3.57      | C-8                       | 68.77          |
|              | H-10                                  | 3.15           | C-9                       | 71.24          |
|              | H-11                                  | 3.37-3.57      | C-10                      | 54.59          |
|              | H-12                                  | 1.77           | C-11                      | 68.77          |
|              | H-13 – H-21                           | 1.27-1.35      | C-12                      | 24.91          |
|              | H-22                                  | 0.85           | C-13                      | 28.28          |
|              | -OCH <sub>3</sub>                     | 3.77           | C-14, C-17,<br>C-18 – C21 | 30.97-31.60    |
|              |                                       |                | C-15                      | 34.06          |
|              |                                       |                | C-16                      | 24.78          |
|              |                                       |                | C-22                      | 16.29          |
|              |                                       |                | -OCH <sub>3</sub>         | 54.34          |
